# Supplementary material
Source: publisher figshare collection journal article supplement (https://acs.figshare.com/ndownloader/files/3786730)
Supplement: Supplementary file 1 [file 3786730]

# Supporting Information

## Rapid Synthesis of C-TiO<sub>2</sub>: Tuning the Shape from Spherical to Rice Grain Morphology for Visible Light Photocatalytic Applications

Balaji Sambandam<sup>a</sup>, Anupama Surenjan<sup>b</sup>, Ligy Philip<sup>b</sup>, and Thalappil Pradeep<sup>a</sup>

<sup>a</sup>DST Unit of Nanoscience and Thematic Unit of Excellence, Department of Chemistry, Indian Institute of Technology Madras, Chennai 600036, India and

<sup>b</sup>Department of Civil Engineering, Indian Institute of Technology Madras, Chennai 600036, India.

**Table S1: Results from varying reaction time\*\***

| S.No  | Time in min | Morphology         | Crystalline phase |
|-------|-------------|--------------------|-------------------|
| CT-13 | 10          | spherical          | Anatase           |
| CT-14 | 18          | spherical and oval | Anatase           |
| CT-15 | 40          | spherical and oval | Anatase           |

\*\* Conditions: Volume: 80% ; Temperature: 150 °C; Concentrations: Same as in C1 (see Table 1), power: 400 W

**Table S2: Results from varying the volume<sup>#</sup>**

| S.No  | Volume | Morphology             | Crystalline phase |
|-------|--------|------------------------|-------------------|
| CT-16 | 50%    | spherical              | Anatase           |
| CT-17 | 40%    | distorted spherical    | Anatase           |
| CT-18 | 30%    | no specific morphology | Anatase           |

<sup>#</sup> Conditions: Temperature: 150 °C; Time: 30 min; Concentrations: Same as in C1; power: 400 W

**Table S3: Results from varying the temperature<sup>\$</sup>**

| S.No  | Temp in (° C) | Morphology             | Crystalline phase |
|-------|---------------|------------------------|-------------------|
| CT-19 | 70            | no specific morphology | Anatase           |
| CT-20 | 100           | no specific morphology | Anatase           |

<sup>\$</sup> Conditions: Time: 30 min; Concentrations: Same as in C1; power: 400 W, Volume: 80%

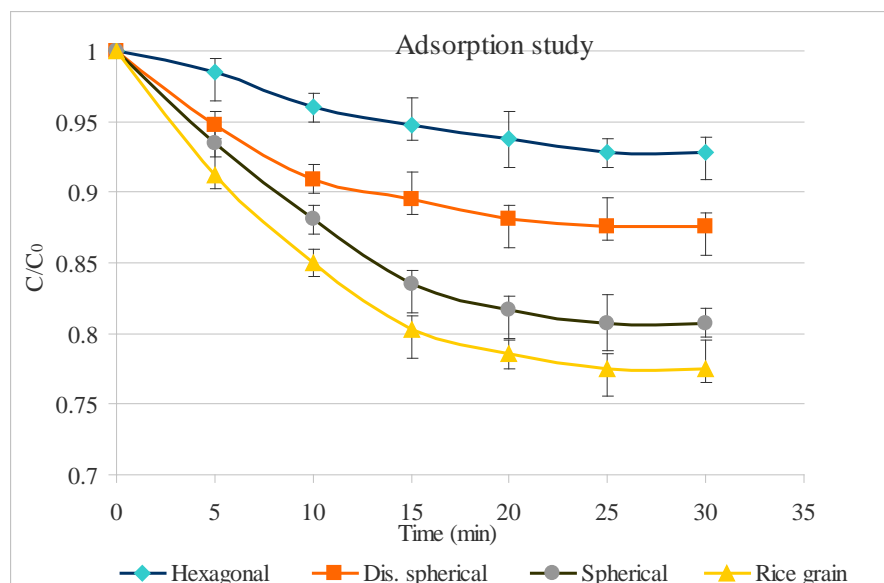

**Figure S1. Removal of carbamazepine using different shapes of C-TiO<sub>2</sub> catalysts in dark.**

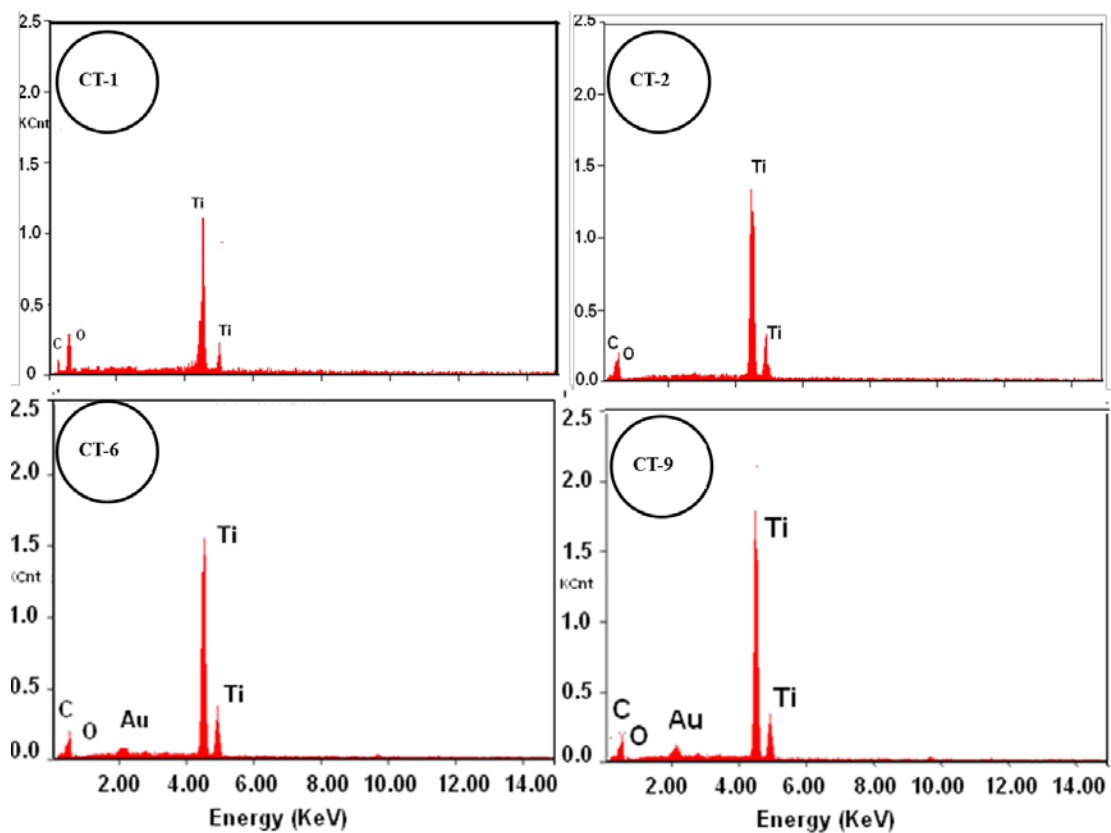

**Figure S2. EDS pattern for four different morphologies of C-TiO<sub>2</sub>.**

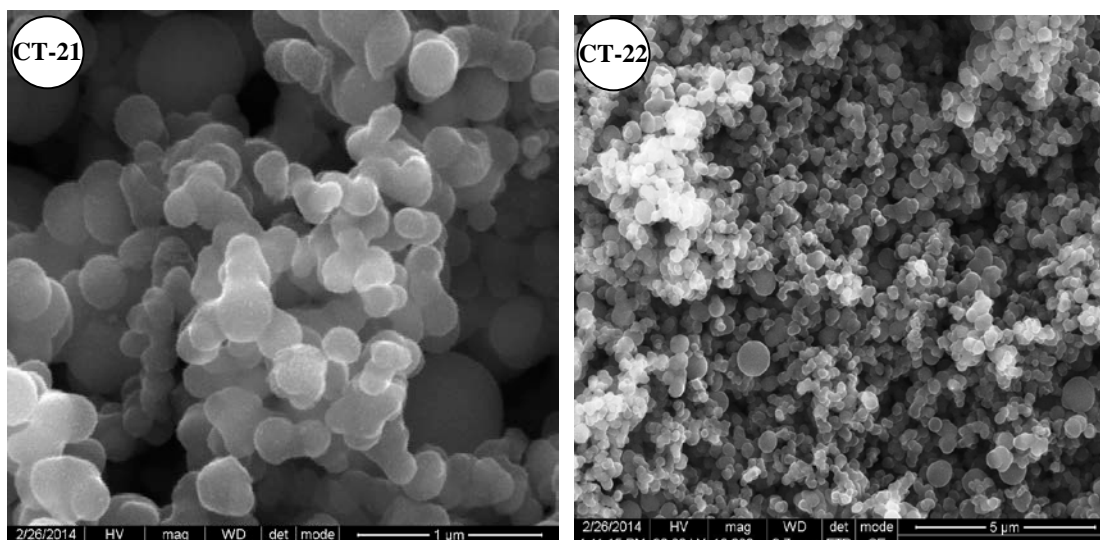

**Figure S3. HRSEM images for C-TiO<sub>2</sub> at higher concentration of the ingredients.**

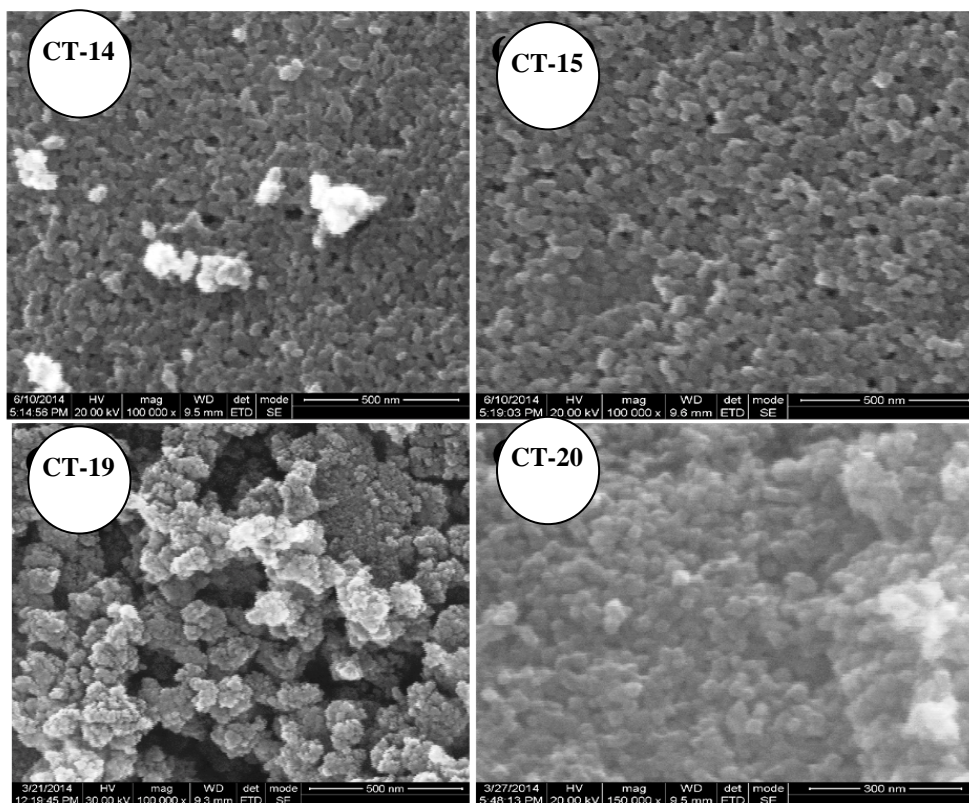

**Figure S4. HRSEM images for C-TiO<sub>2</sub> of CT-14 and CT-15 (see Tables S1 and S3) showcasing time and temperature dependence of synthesis.**

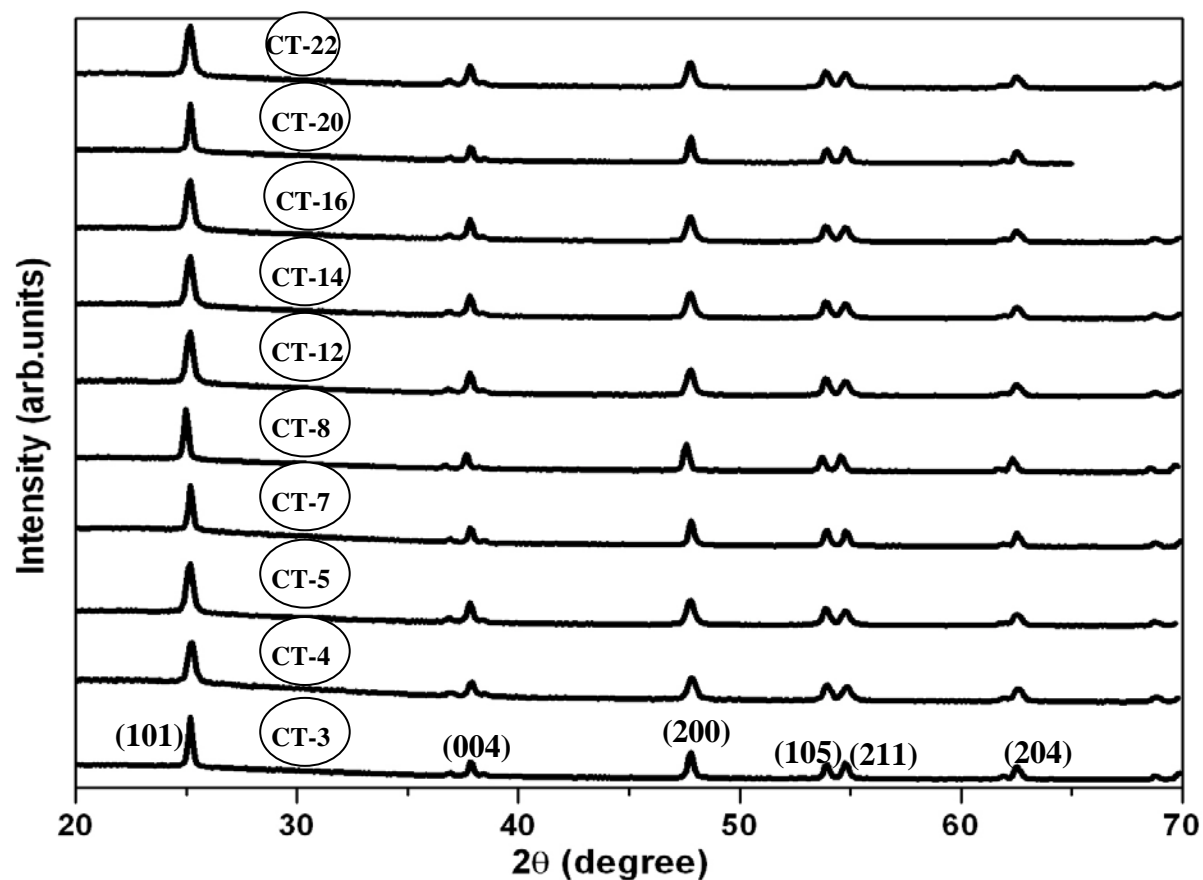

Figure S5. XRD profile for C-TiO<sub>2</sub> at various preparative conditions.

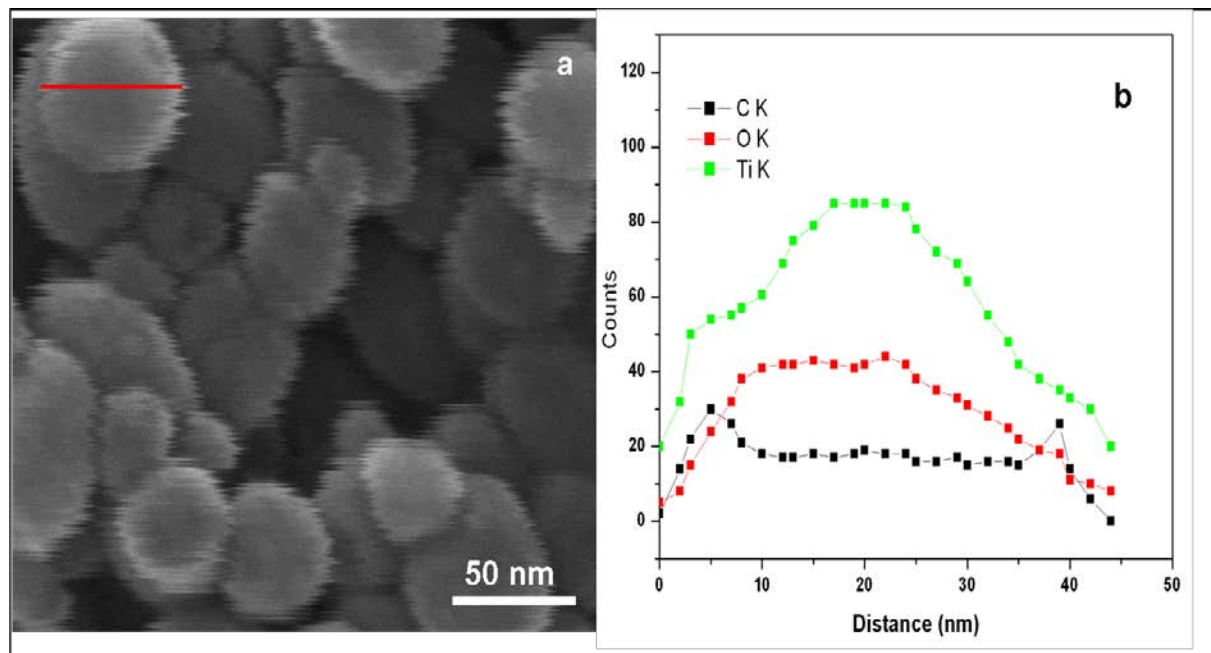

Figure S6. (a) HRSEM image of spherical shaped C-TiO<sub>2</sub> and (b) corresponding EDS line scan data for a single particle as marked by a red line in (a).



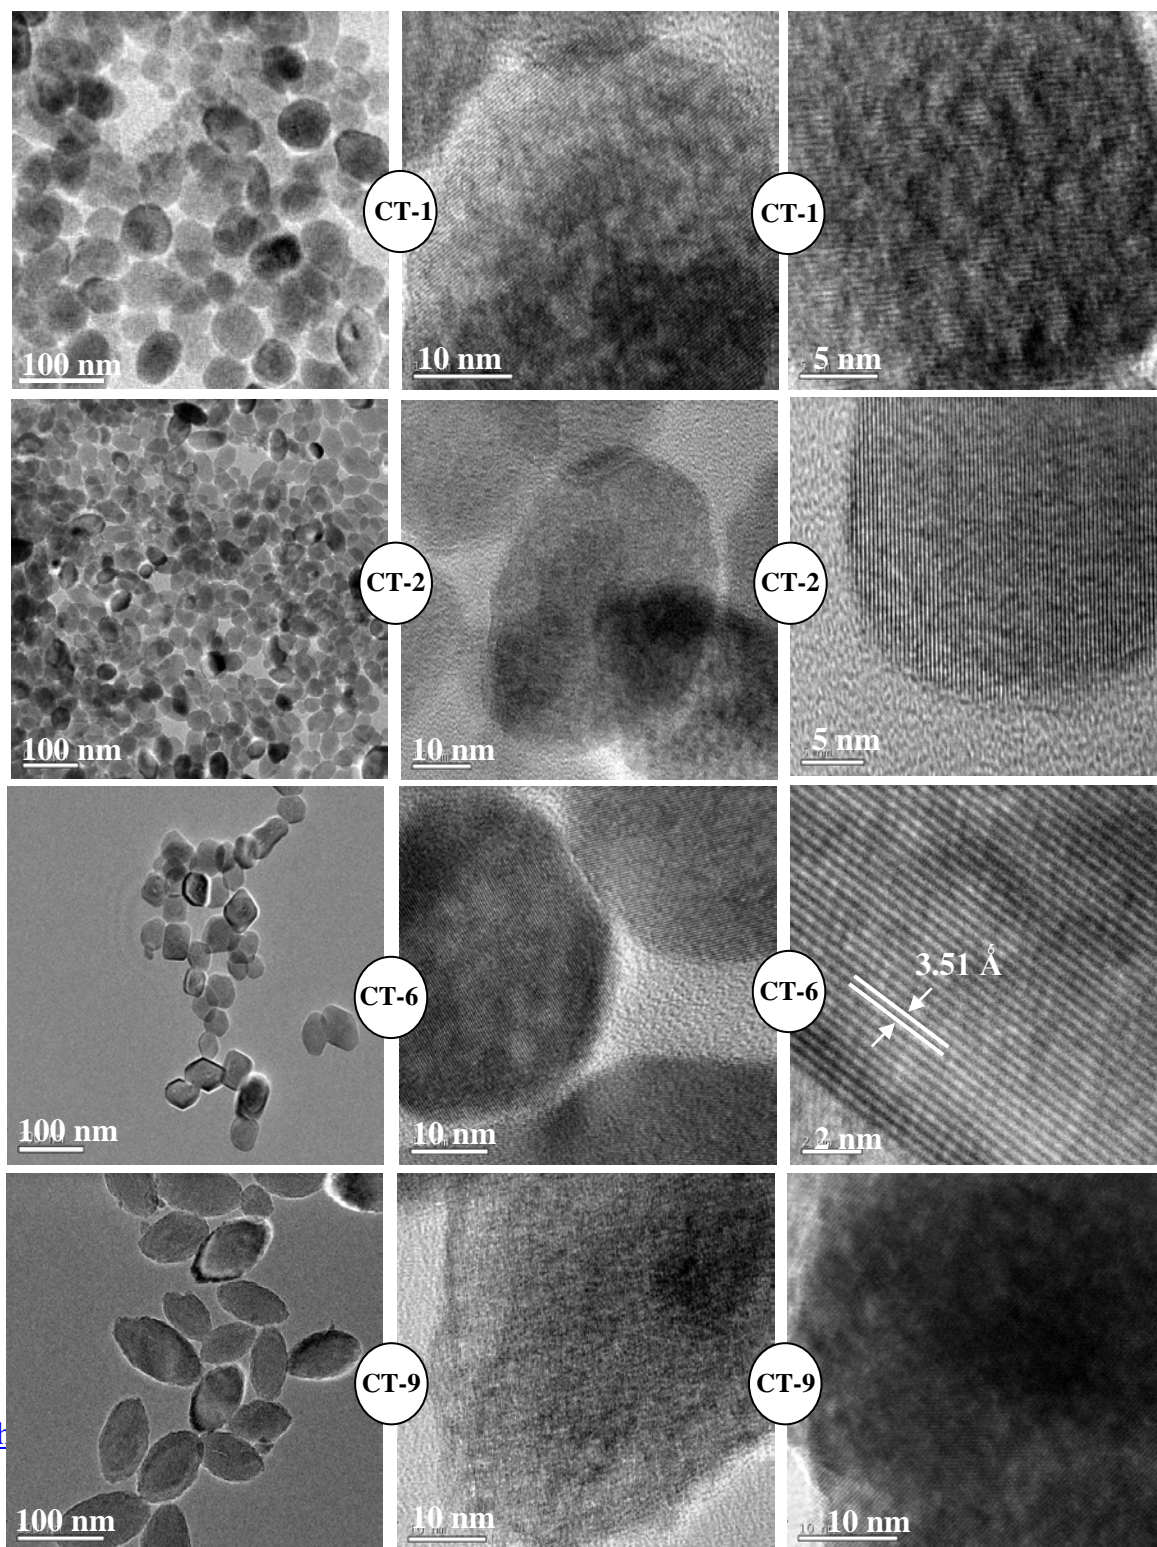

**Figure S7. HRTEM images for the four different morphologies of C-TiO<sub>2</sub> nanocrystals.**

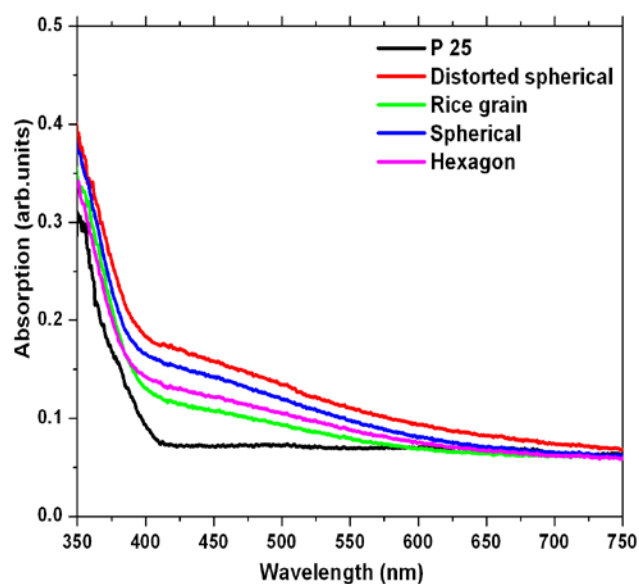

**Figure S8.** UV-vis diffuse reflectance profiles for four different morphologies of C-TiO<sub>2</sub> in comparison with P25 Degussa (bulk TiO<sub>2</sub>).

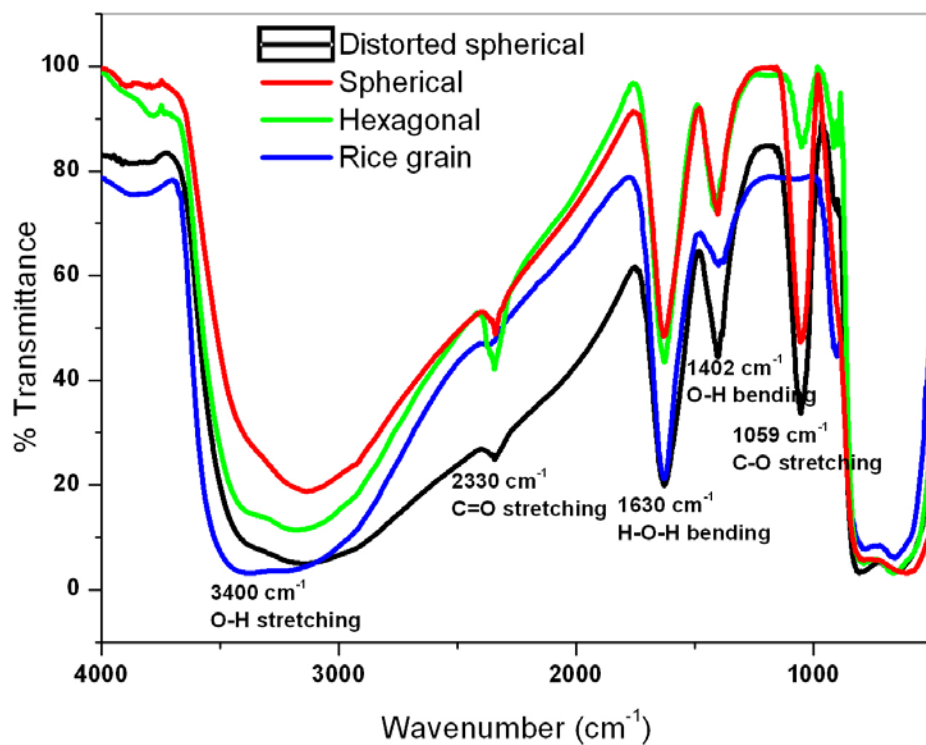

**Figure S9.** FT-IR spectra for C-TiO<sub>2</sub> of four different morphologies.

**Table S4. BET surface area for the different morphologies of C-TiO<sub>2</sub>**

| Sample code                | Surface area,<br>m <sup>2</sup> /g | Pore volume,<br>cc/g | Pore diameter,<br>Å |
|----------------------------|------------------------------------|----------------------|---------------------|
| Spherical (CT-1)           | 62                                 | 0.24                 | 180                 |
| Distorted spherical (CT-2) | 61                                 | 0.19                 | 224                 |
| Hexagonal (CT-6)           | 33                                 | 0.18                 | 190                 |
| Rice grain (CT-9)          | 229                                | 0.17                 | 36                  |

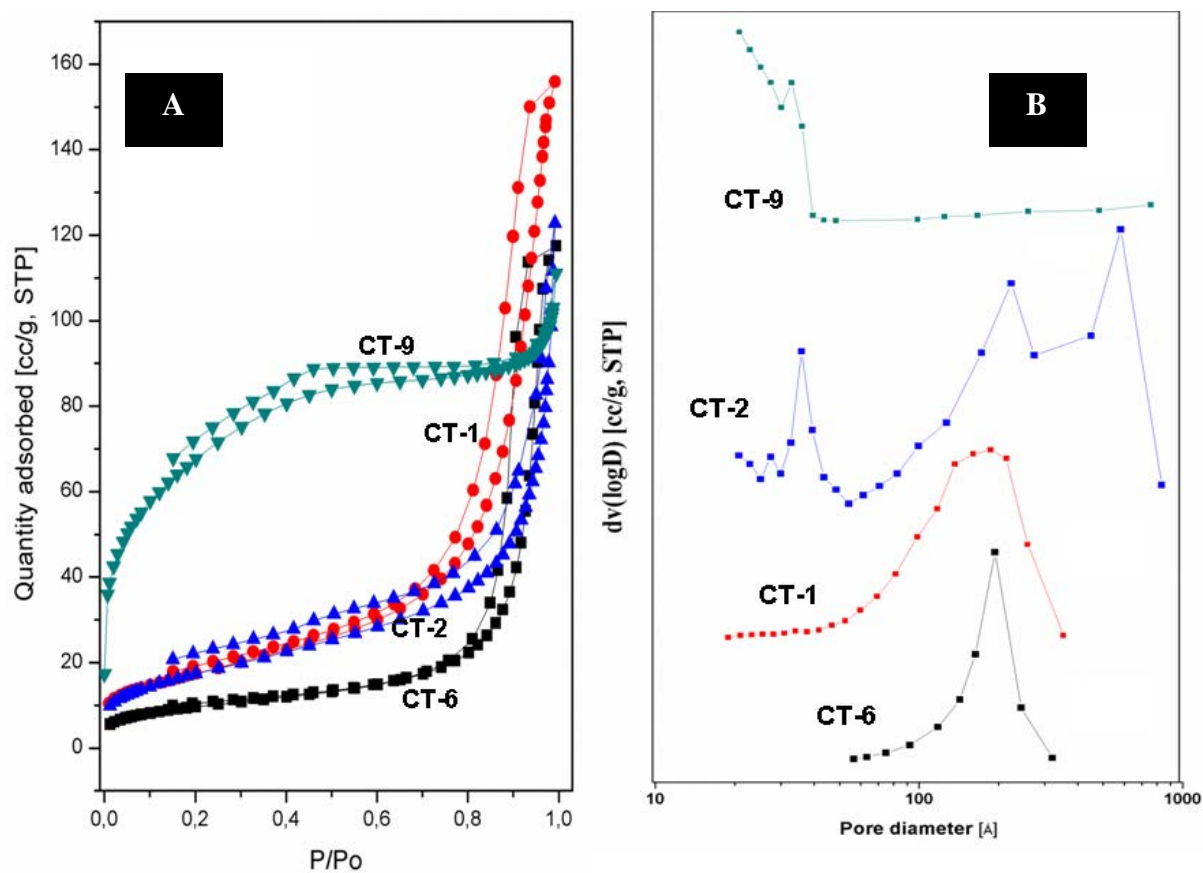

**Figure S10. N<sub>2</sub>-adsorption-desorption isotherm liner plot (A) and BJH desorption average pore diameter (B) for four different morphologies of C-TiO<sub>2</sub>.**

**Table S5. Rate of degradation of Carbamazepine using different shaped C-TiO<sub>2</sub>**

| Pollutant                 | Catalyst shape             | R <sup>2</sup> | K min <sup>-1</sup> |
|---------------------------|----------------------------|----------------|---------------------|
| Carbamazepine<br>(50µg/L) | Rice grain (CT-9)          | 0.98           | 0.094               |
|                           | Spherical (CT-1)           | 0.99           | 0.059               |
|                           | Distorted spherical (CT-2) | 0.99           | 0.044               |
|                           | Hexagonal (CT-6)           | 0.97           | 0.020               |

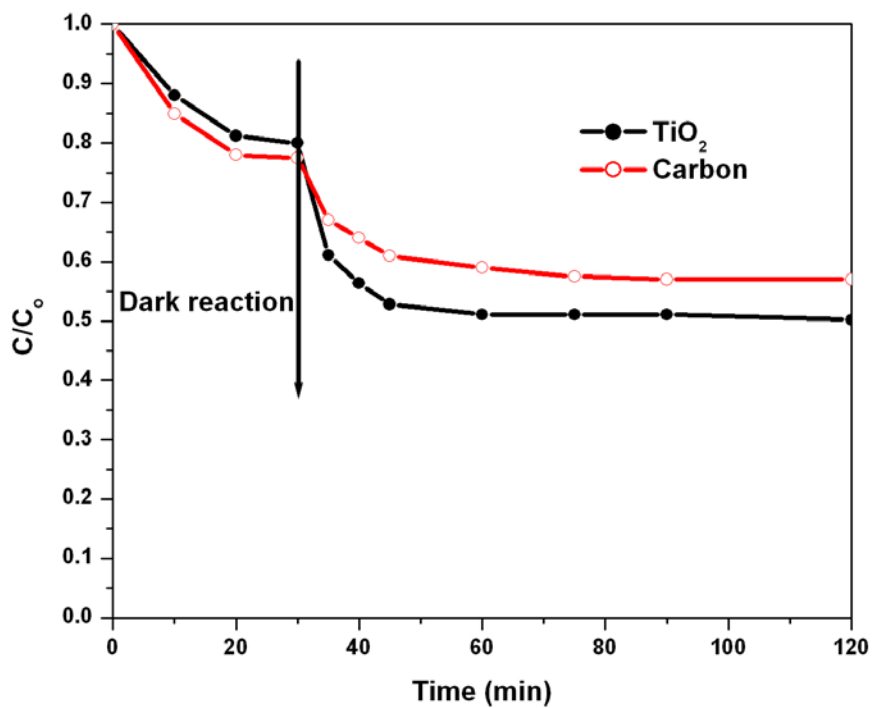

**Figure S11. Photocatalytic activity for carbamazepine by TiO<sub>2</sub> and carbon prepared by CT-1 method.**
